# Supplementary material for: Dysfunction of the Voltage‐Gated K+ Channel β2 Subunit in a Familial Case of Brugada Syndrome
Source: PubMed Central journal article supplement — J Am Heart Assoc. 2016 Jun 10;5(6):e003122. doi: 10.1161/JAHA.115.003122 (PMC4937261; doi:10.1161/jaha.115.003122), 2016-06-10
Supplement: JAH3-5-e003122-s001.pdf [file JAH3-5-e003122-s001.pdf]

## Supplemental Material

### Portero *et al.*: Dysfunction of the voltage-gated K<sup>+</sup> channel beta-2 subunit in a familial case of Brugada syndrome

Correspondence should be addressed to Richard Redon, Inserm UMR 1087 / CNRS UMR 6291, l'institut du thorax, IRS-UN, 8 Quai Moncoussu, Nantes, France. E-mail:

[richard.redon@inserm.fr](mailto:richard.redon@inserm.fr). Tel: +33 (0)2 28 08 01 41.

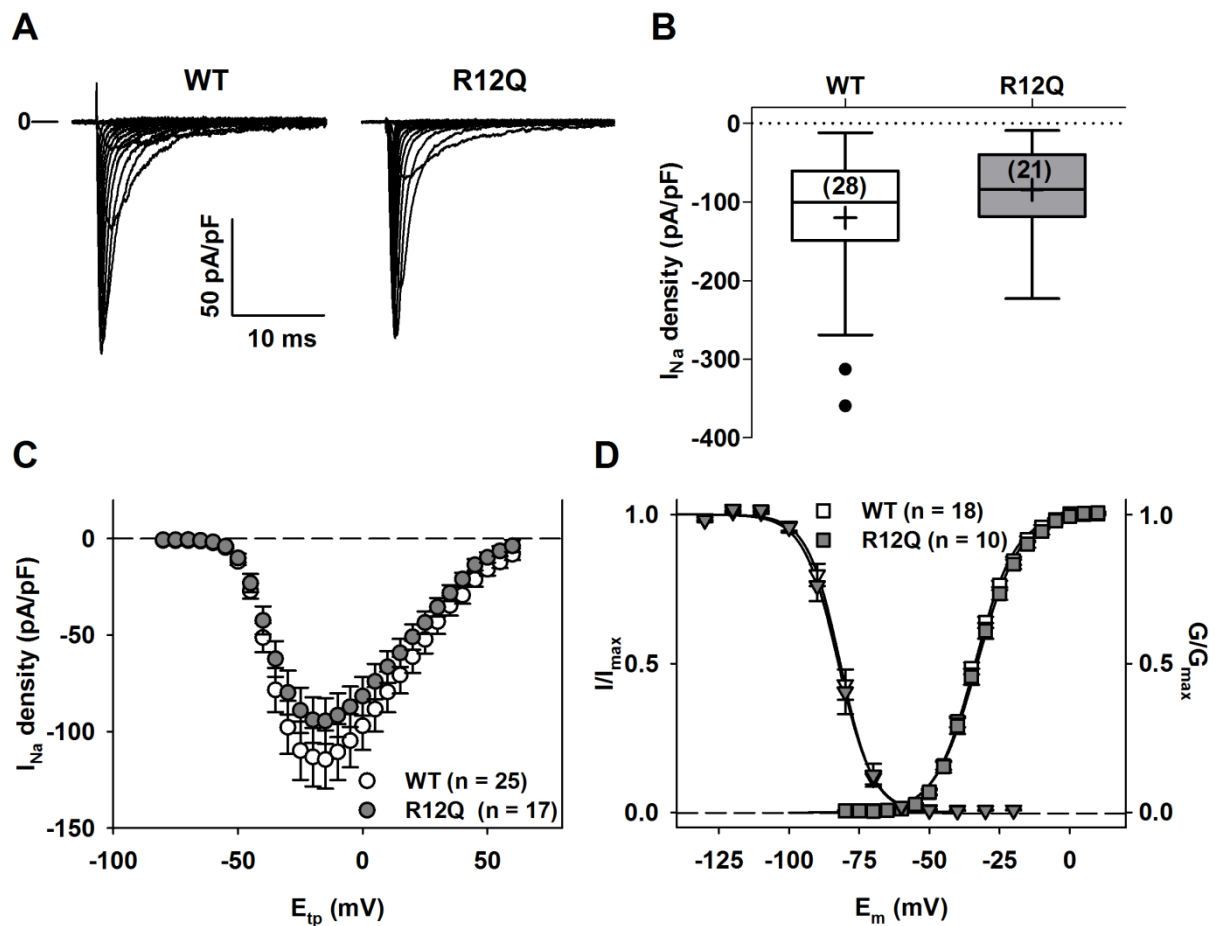

**Figure S1**

Absence of effect of R12Q K $\nu\beta$ 2 mutation on heterologously expressed Nav1.5-generated current. (A) Superimposed representative currents activated by a 50-ms pulse every 1 s to various potentials (from -80 mV to +60 mV, 5-mV increments; holding potential: -100 mV;

only one out of two pulses are shown for clarity) obtained from COS-7 cells expressing Nav1.5, Nav $\beta$ 1 and either wild-type (WT; left) or R12Q (right) Kv $\beta$ 2. (B) Tukey plots of peak current (I<sub>Na</sub>) densities recorded at -20 mV. Sample size is indicated in brackets, only outlier values are represented as symbols. (C) Mean I<sub>Na</sub> density/voltage relationship of Nav1.5-generated currents in cells expressing Nav1.5, Nav $\beta$ 1 and either WT or R12Q Kv $\beta$ 2. (D) Relative peak conductance (G/G<sub>max</sub>) versus test-pulse membrane potential (activation) and steady-state channel availability at -20 mV (I/I<sub>max</sub>) versus prepulse potential (inactivation) plots for Nav1.5 channels. Inactivation voltage protocol: 500-ms polarization to various prepulse potentials from -110 to -50 mV (10-mV increment) and test pulse at -20 mV for 20 ms (holding potential -100 mV; frequency 0.25 Hz). Curves are Boltzmann fits to the data.

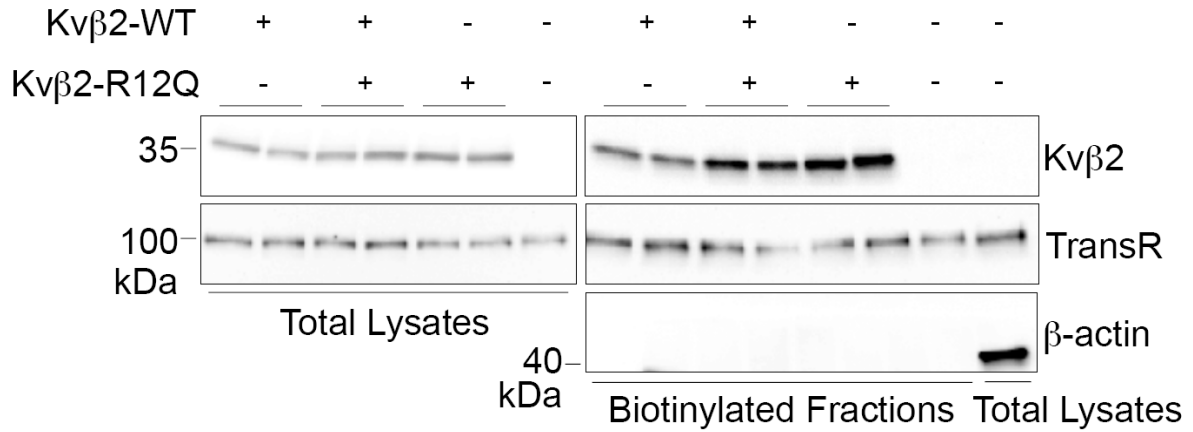

**Figure S2**

The submembrane expression of the heterologously expressed Kvβ2-R12Q protein is increased in the absence of Kv4.3. Forty-eight hours following transfection of COS-7 cells with cDNA constructs encoding Kvβ2-WT and/or Kvβ2-R12Q, cell lysates were prepared and used in cell surface biotinylation assays. Representative western blots of total (left) and biotinylated (right) Kvβ2 fractions from transfected COS-7 cells show that the R12Q mutation increases Kvβ2 submembrane protein expression in the absence of Kv4.3 and whether expressed alone or coexpressed with Kvβ2-WT. Western blot analyses of the transferrin receptor (TransR) and β-actin confirmed equal protein loading and absence of contamination of the biotinylated fractions by cytoplasmic proteins, respectively.

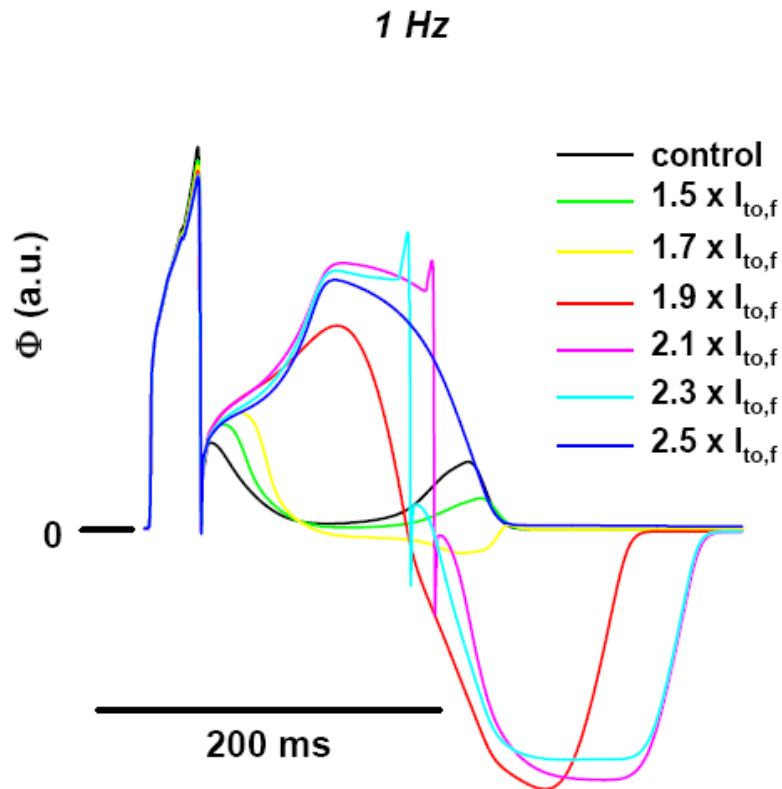

**Figure S3**

Modeling the effect of the R12Q variant at the heterozygous state. Right ventricular outflow tract wedge pseudo-ECGs, when the Kv4.3 current density is increased by a factor varying from the minimal value of 1.5, when considering only the lower limit for the heterozygous R12Q condition, to the averaged value of 2.5 (see figure 5A, a.u.: arbitrary units).

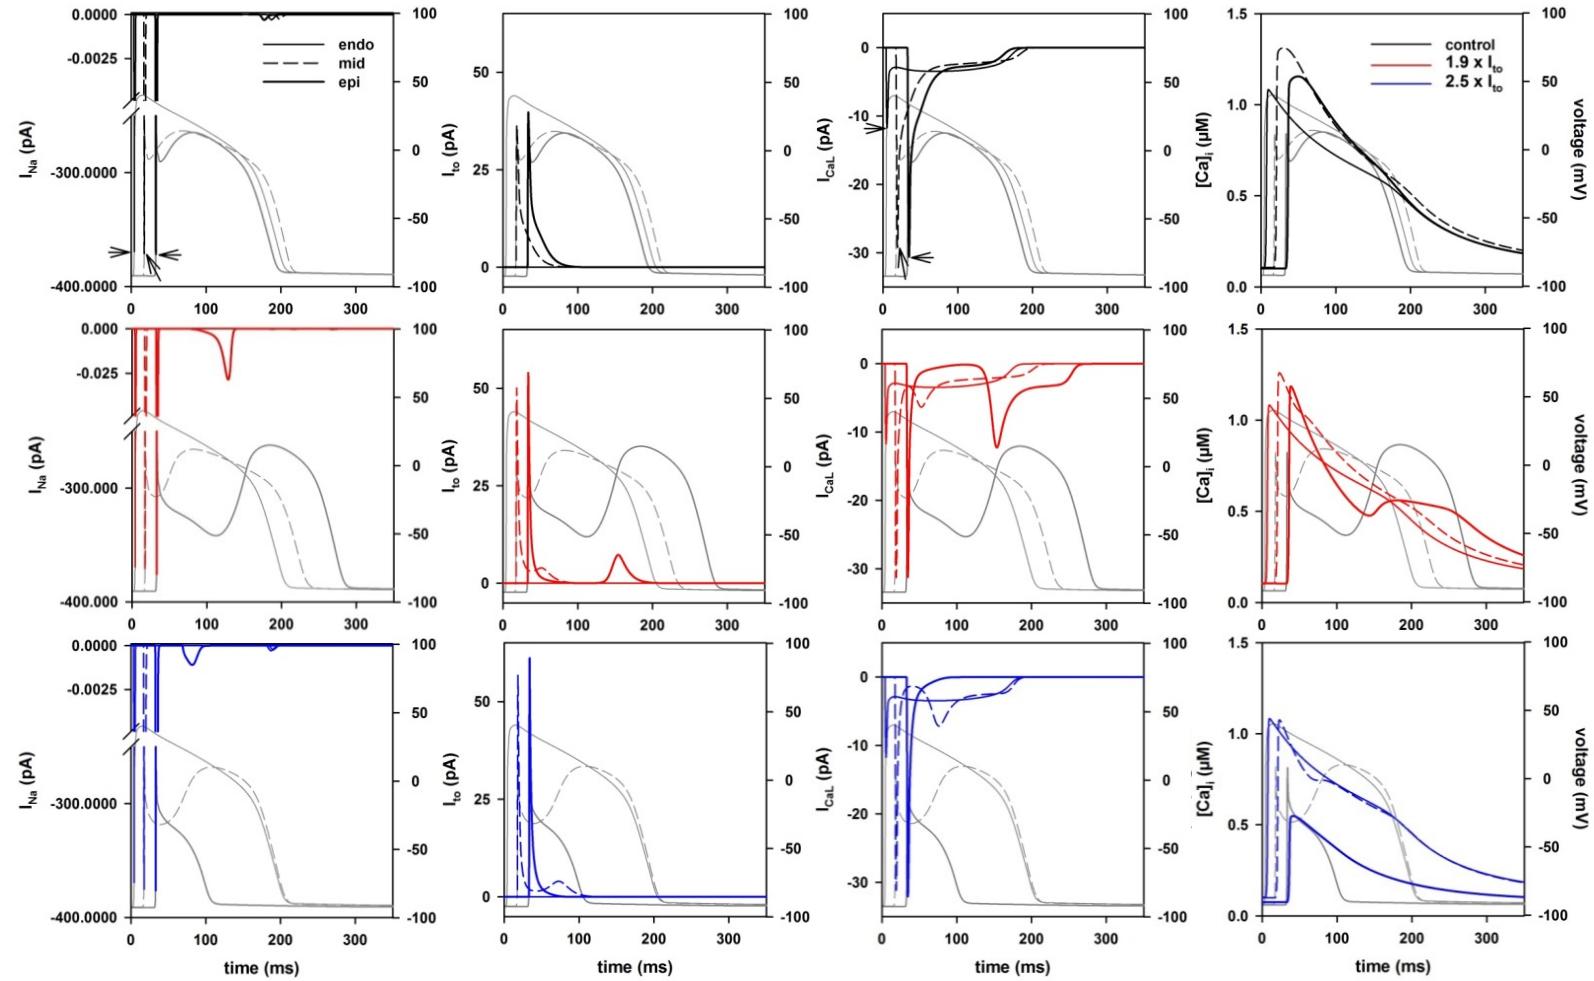

**Figure S4**

Ion currents and Ca<sup>2+</sup> transients underlying the different APs (grey) in control condition (black) and in presence of a 1.9-fold (red) or a 2.5-fold (blue) increase in I<sub>to,f</sub>. See multiple scales for I<sub>Na</sub> graphs. Arrows indicate the peak currents in control condition.

**Table S1. Clinical characteristics of the Kv $\beta$ 2-R12Q family**

|                                    | II.3 (proband)                   | II.1   | II.4   | I.2    | I.1                   | II.2   |     |
|------------------------------------|----------------------------------|--------|--------|--------|-----------------------|--------|-----|
| Age at diagnosis                   | 39                               | 32     | 34     | 59     | 70                    | 35     |     |
| Holter monitoring                  | Polymorphic VT                   | Normal | Normal | Normal | Normal                | Normal |     |
| Echocardiography                   | Normal                           | Normal | Normal | Normal | LVEF 45%, LVTDD 67 mm | Normal |     |
| Baseline ECG                       | HR (bpm)                         | 86     | 78     | 63     | 75                    | 85     | 63  |
|                                    | PR (ms)                          | 173    | 167    | 190    | 184                   | 165    | 165 |
|                                    | QRS (ms)                         | 105    | 90     | 108    | 110                   | 148    | 78  |
|                                    | QT (ms)                          | 367    | 361    | 382    | 372                   | 381    | 385 |
|                                    | QTc (ms)                         | 439    | 412    | 391    | 416                   | 453    | 395 |
|                                    | J V1 (mm)                        | 2.5    | 0      | 0.5    |                       |        |     |
|                                    | J V2 (mm)                        | 5      | 1      | 0      |                       |        |     |
|                                    | J V3 (mm)                        | 2      | 0      | 0      |                       |        |     |
|                                    | max TPE in precordial leads (ms) | 75     | 71     | 78     |                       |        |     |
| AH interval (ms)                   | 96                               | 105    | 119    |        |                       |        |     |
| HV interval (ms)                   | 57                               | 54     | 56     |        |                       |        |     |
| Programmed ventricular stimulation | FV                               | Normal | Normal |        |                       |        |     |
| Ventricular refractory period (ms) | 210                              | <200   | <200   |        |                       |        |     |
| Electrophysiological study         |                                  |        |        |        |                       |        |     |

**Table S2. Rare variants co-segregating with the Brugada ECG phenotype in a familial case of Brugada syndrome**

| CHR | POS (hg19) | REF | ALT | Segregation                             | Gene          | GERP  | dbSNP       | Consequence          | HGVSc; HGVSg                                         | SIFT; PolyPhen                                           | I:1 | I:2 | II:1 (aff) | II:2 | II:3 (aff) | II:4 (aff) |
|-----|------------|-----|-----|-----------------------------------------|---------------|-------|-------------|----------------------|------------------------------------------------------|----------------------------------------------------------|-----|-----|------------|------|------------|------------|
| 1   | 6100663    | G   | A   | Segregation (inherited from father I:1) | <i>KCNAB2</i> | 4.99  | rs758297152 | missense_variant     | NM_003636.3:c.35G>A; NP_003627.1:p.Arg12Gln          | tolerated_low_confidence(0.06); probably_damaging(0.953) | +   | -   | +          | -    | +          | +          |
| 3   | 49159478   | G   | T   | Segregation (inherited from father I:1) | <i>LAMB2</i>  | 5.55  | rs777742373 | missense_variant     | NM_002292.3:c.4822C>A; NP_002283.3:p.Gln1608Lys      | tolerated(1); benign(0.003)                              | +   | -   | +          | -    | +          | +          |
| 5   | 125801239  | T   | C   | Segregation (inherited from father I:1) | <i>GRAMD3</i> | 4.72  | rs200501308 | splice_donor_variant | NM_001146319.1:c.248+2T>C                            | -                                                        | +   | -   | +          | -    | +          | +          |
| 5   | 140078090  | C   | T   | Segregation (inherited from father I:1) | <i>HARS2</i>  | 4.57  | rs752851001 | missense_variant     | NM_001278731.1:c.1399C>T; NP_001265660.1:p.Arg467Trp | deleterious(0.01); probably_damaging(0.991)              | +   | -   | +          | -    | +          | +          |
| 9   | 113013717  | G   | A   | Segregation (inherited from father I:1) | <i>TXN</i>    | -6.21 | rs146018216 | missense_variant     | NM_001244938.1:c.50C>T; NP_001231867.1:p.Ala17Val    | tolerated(0.11); benign(0.001)                           | +   | -   | +          | -    | +          | +          |
| 9   | 123636952  | T   | C   | Segregation (inherited from father I:1) | <i>PHF19</i>  | 3.5   | rs146513217 | missense_variant     | NM_001009936.1:c.68A>G; NP_001009936.1:p.Lys23Arg    | tolerated_low_confidence(0.11); benign(0.008)            | +   | -   | +          | -    | +          | +          |

**Table S3. *In silico* ranking of candidate genes**

| <i>Gene</i>          | <i>Endeavour</i> |              |                   | <i>ToppGene</i> |                      |                               |
|----------------------|------------------|--------------|-------------------|-----------------|----------------------|-------------------------------|
|                      | <i>Rank</i>      | <i>Score</i> | <i>Rank ratio</i> | <i>Rank</i>     | <i>Average Score</i> | <i>Overall pValue</i>         |
| <b><i>KCNAB2</i></b> | <b>1</b>         | <b>0.192</b> | <b>0.167</b>      | <b>1</b>        | <b>0.763</b>         | <b>2.42 x 10<sup>-4</sup></b> |
| <i>LAMB2</i>         | 2                | 0.210        | 0.333             | 2               | 0.385                | 0.006                         |
| <i>PHF19</i>         | 3                | 0.606        | 0.500             | 5               | 0.455                | 0.262                         |
| <i>TXN</i>           | 4                | 0.616        | 0.667             | 3               | 0.332                | 0.091                         |
| <i>GRAMD3</i>        | 5                | 0.742        | 0.833             | 6               | 0.107                | 0.850                         |
| <i>HARS2</i>         | 6                | 0.981        | 1.00              | 4               | 0.040                | 0.242                         |



**Table S4. Absence of effects of R12Q mutation of Kv $\beta$ 2 on sodium channel biophysical parameters.**

|                       | cell capacitance   | current density           | activation              |                       | inactivation            |                        | recovery from inactivation |                        |                          |
|-----------------------|--------------------|---------------------------|-------------------------|-----------------------|-------------------------|------------------------|----------------------------|------------------------|--------------------------|
| Nav1.5 + Kv $\beta$ 2 | (pF)               | at -20 mV (pA/pF)         | $V_{1/2}$ (mV)          | K (mV)                | $V_{1/2}$ (mV)          | K (mV)                 | $A_{fast}$ (%)             | $\tau_{fast}$ (ms)     | $\tau_{slow}$ (ms)       |
| WT                    | 20 $\pm$ 1<br>(28) | -120.4 $\pm$ 16.9<br>(28) | -33.7 $\pm$ 0.6<br>(28) | 6.9 $\pm$ 0.2<br>(28) | -81.9 $\pm$ 1.2<br>(18) | -5.0 $\pm$ 0.1<br>(18) | 79.2 $\pm$ 3.1<br>(19)     | 32.7 $\pm$ 2.9<br>(19) | 597.5 $\pm$ 65.3<br>(19) |
| R12Q                  | 24 $\pm$ 2<br>(21) | -84.8 $\pm$ 11.5<br>(21)  | -32.9 $\pm$ 0.8<br>(19) | 7.2 $\pm$ 0.2<br>(19) | -82.6 $\pm$ 1.8<br>(10) | -5.2 $\pm$ 0.3<br>(10) | 87.9 $\pm$ 2.1<br>(9)      | 36.9 $\pm$ 4.5<br>(9)  | 614.2 $\pm$ 110.2<br>(9) |

(n): number of cells;  $V_{1/2}$  and K; voltage for half-activation or -inactivation of the Na<sup>+</sup> current and slope;  $A_{fast}$  and  $\tau_{fast}$ : coefficient and time constant of the fast component of reactivation kinetics,  $\tau_{slow}$ : time constant of the slow component. Voltage protocol of the recovery from inactivation studies: pre-pulse to -20 mV for 100 ms, repolarization to holding potential at -100 mV for various delays from 1 ms to 1000 ms with increasing increments followed by a 20-ms test pulse to -20 mV (frequency: 1/3 Hz).
